# Supplementary material
Source: PubMed Central journal article supplement (PMC3232906)
Supplement: supp_193.23.6443_FigureS1.pdf [file supp_193.23.6443_FigureS1.pdf]

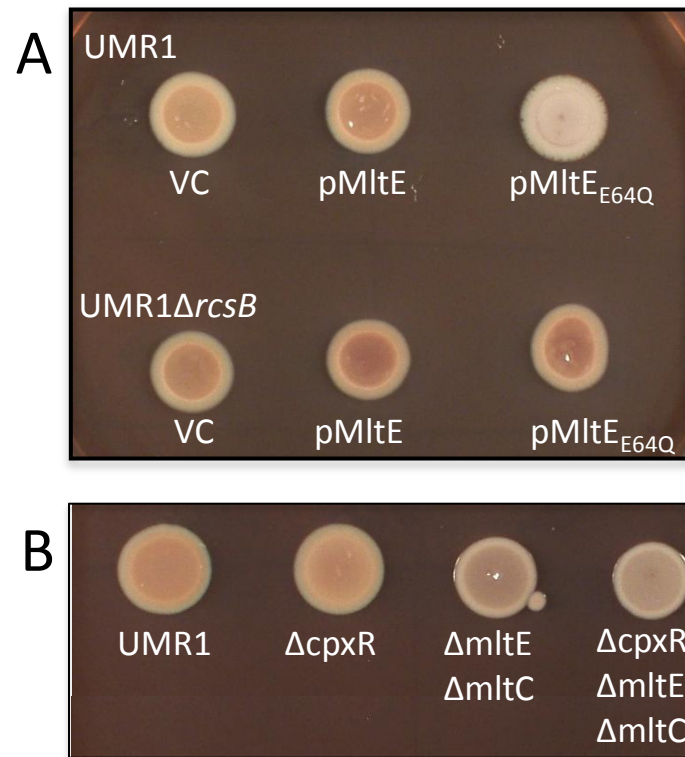

**FIG S1. Morphotypes of regulatory mutants responsive to periplasmic stress in combination with MltE/MltC.** A) Rdar morphotype expression is also upregulated in the *rcsB* mutant upon MltE overexpression. Catalytically inactive MltE<sub>E64Q</sub> induces the mucoid phenotype through RcsB. Expression of MltE<sub>E64Q</sub> in the wild type strain *S. typhimurium* UMR1 induced mucoidy (indicative as a white colony color), while expression of MltE<sub>E64Q</sub> in the *rcsB* mutant retained the phenotype of the *rcsB* vector control. VC, vector control pBAD30. B) Rdar morphotype expression is equally downregulated in the wild type UMR1 and the *cpxR* mutant upon deletion of *mltE* and *mltC*. Cells were grown on CR agar plates at 28°C for 24 h.
