# Supplementary material
Source: PubMed Central journal article supplement (PMC3232906)
Supplement: supp_193.23.6443_FigureS2.pdf [file supp_193.23.6443_FigureS2.pdf]

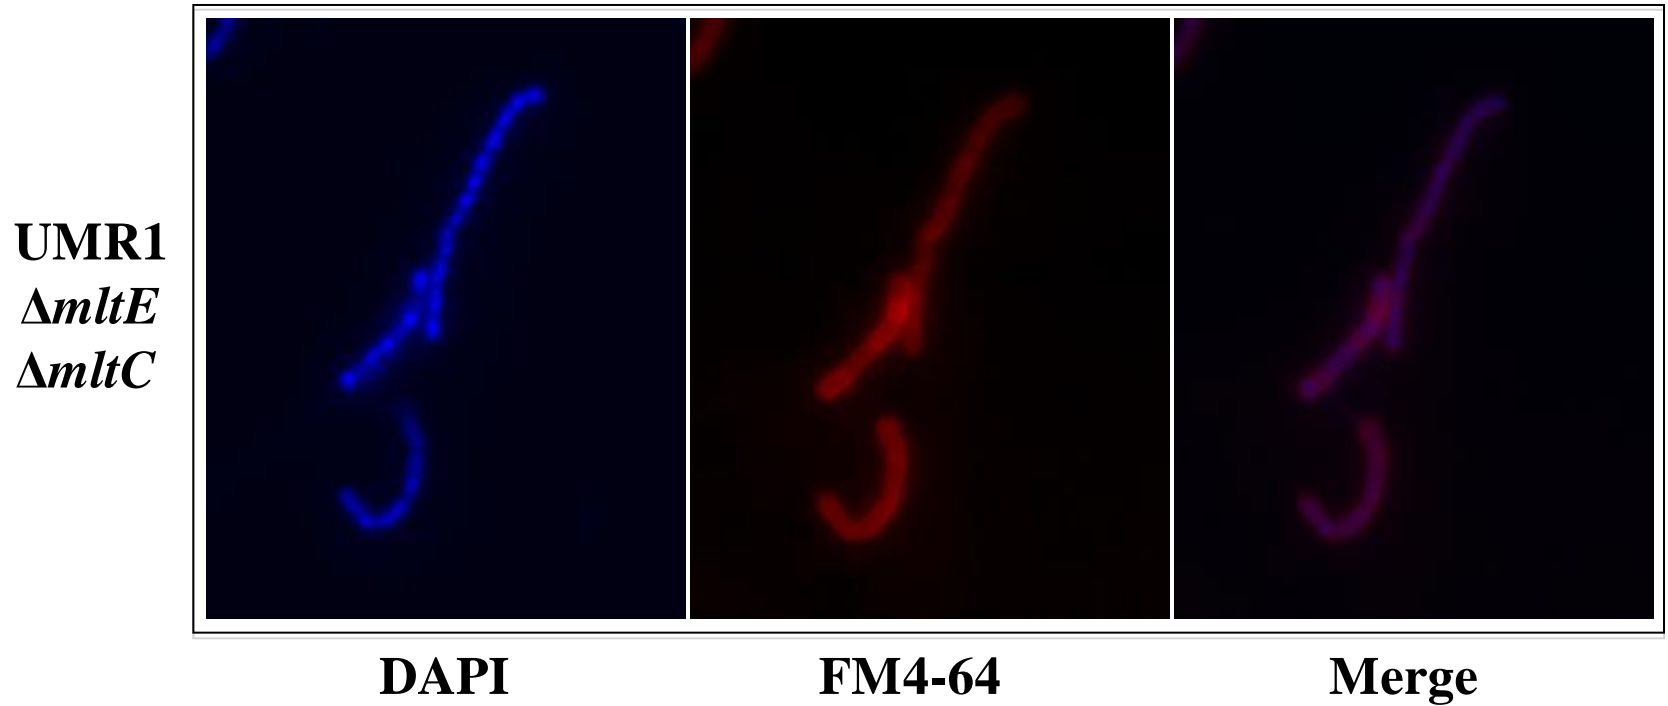

**FIG. S2. Morphological characterization of the *ΔmItE ΔmItC* mutant.** Fluorescence microscopy of the *ΔmItE ΔmItC* double mutant. The double mutant formed long chains of cells unable to divide. Blue, DNA stain DAPI; red, membrane stain FM4-64. magnification x1000.
